# Supplementary material for: Distinct chemical and mineralogical composition of Icelandic dust compared to northern African and Asian dust
Source: Copernicus journal article supplement (doi:10.5194/acp-20-13521-2020), 2020-11-12
Supplement: Supplementary file 1 [file acp-20-13521-2020-supplement.pdf]

Supplement of Atmos. Chem. Phys., 20, 13521–13539, 2020  
<https://doi.org/10.5194/acp-20-13521-2020-supplement>  
© Author(s) 2020. This work is distributed under  
the Creative Commons Attribution 4.0 License.

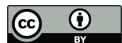

*Supplement of*

## **Distinct chemical and mineralogical composition of Icelandic dust compared to northern African and Asian dust**

**Clarissa Baldo et al.**

*Correspondence to:* Zongbo Shi (z.shi@bham.ac.uk)

The copyright of individual parts of the supplement might differ from the CC BY 4.0 License.

**Table S1: Sampling sites.**

| Dust Hotspot    | Location          | Sample Code | Latitude / Longitude           |
|-----------------|-------------------|-------------|--------------------------------|
| Dyngjusandur    | NE Iceland        | D3          | 64°50'41.885"N / 16°59'40.78"W |
| Hagavatn        | Central W Iceland | H55         | 64°28'52.04"N / 20°27'18.81"W  |
| Landeyjarsandur | S Iceland         | Land1       | 63°34'13"N / 20°02'31"W        |
| Mælifellssandur | Central S Iceland | Mæli2       | 63°48'42.2"N / 19°07'02.5"W    |
| Myrdalssandur   | S Iceland         | MIR45       | 63°32'42.08"N / 18°42'14.14"W  |

10

**Table S2: Complex refractive indexes of the individual minerals used in this study.**

| Mineral        | Reference                  |
|----------------|----------------------------|
| Hematite       | Longtin et al. (1988)      |
| Hematite       | Bedidi and Cervelle (1993) |
| Goethite       | Bedidi and Cervelle (1993) |
| Magnetite      | Querry (1985)              |
| Magnetite      | Huffman and Stapp (1973)   |
| Olivine        | Fabian et al. (2001)       |
| Augite         | Egan and Hilgeman (1979)   |
| Feldspar       | Egan and Hilgeman (1979)   |
| Quartz         | Khashan and Nasif (2001)   |
| Basaltic glass | Pollack et al. (1973)      |

- 15 **Table S3: Amorphous Fe (FeA), dithionite Fe (FeD, Hematite + Goethite), magnetite (FeM), initial Fe solubility (Fe<sub>isol</sub>) and potential Fe solubility (Fe<sub>psol</sub>) as extracted-dissolved Fe to total dust mass. The standard deviation (sd) is reported, n = 3. For Fe<sub>psol</sub>, sd was estimated based on the relative standard deviation obtained for a dust sample from Africa (Libya), n = 7.**

| Samples | FeA<br>wt% (sd) | FeD<br>wt% (sd) | FeM<br>wt% (sd) | Fe <sub>isol</sub><br>wt% (sd) | Fe <sub>psol</sub><br>wt% (sd) |
|---------|-----------------|-----------------|-----------------|--------------------------------|--------------------------------|
| D3      | 0.1 (0.02)      | 0.44 (0.04)     | 1.76 (0.26)     | 0.07 (0.002)                   | 3.35 (0.14)                    |
| H55     | 0.04 (0.004)    | 0.33 (0.02)     | 1.5 (0.20)      | 0.01 (0.001)                   | 1.78 (0.07)                    |
| Land1   | 0.14 (0.03)     | 0.77 (0.09)     | 0.87 (0.02)     | 0.01 (0.001)                   | 2.12 (0.09)                    |
| Mæli2   | 0.18 (0.006)    | 0.79 (0.03)     | 1.66 (0.10)     | 0.03 (0.003)                   | 3.39 (0.14)                    |
| MIR45   | 0.04 (0.001)    | 0.13 (0.002)    | 1 (0.06)        | 0.01 (0.001)                   | 1.75 (0.07)                    |

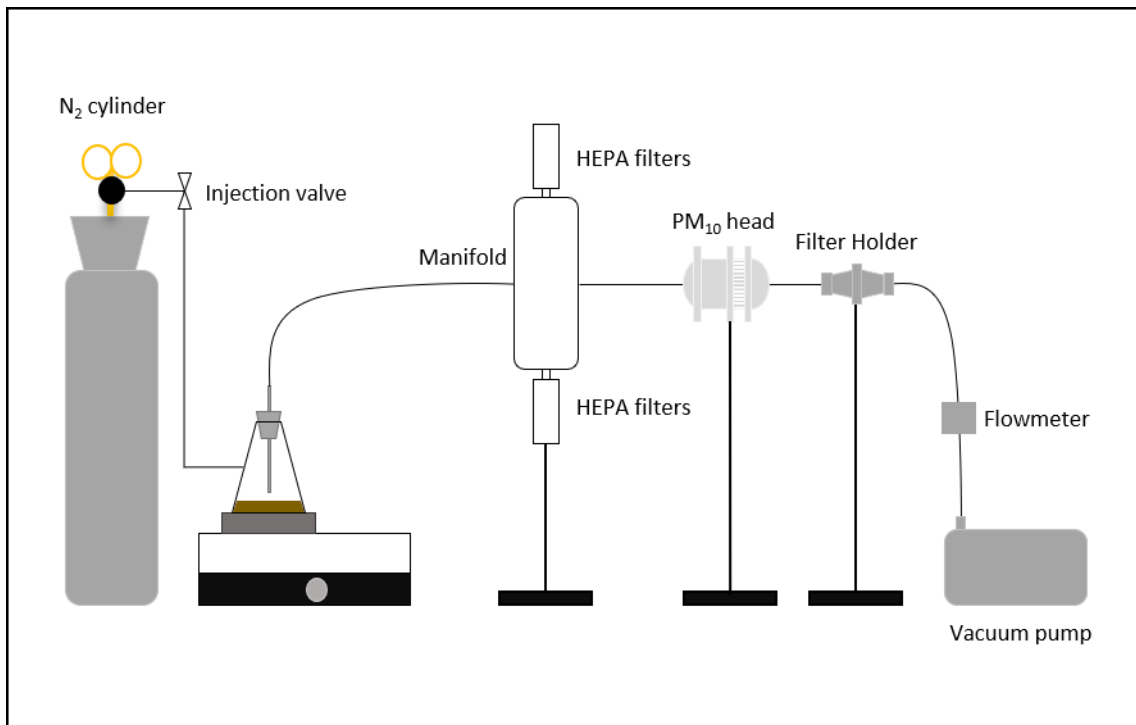

**Figure S1: PM<sub>10</sub> collection system.**

20

25

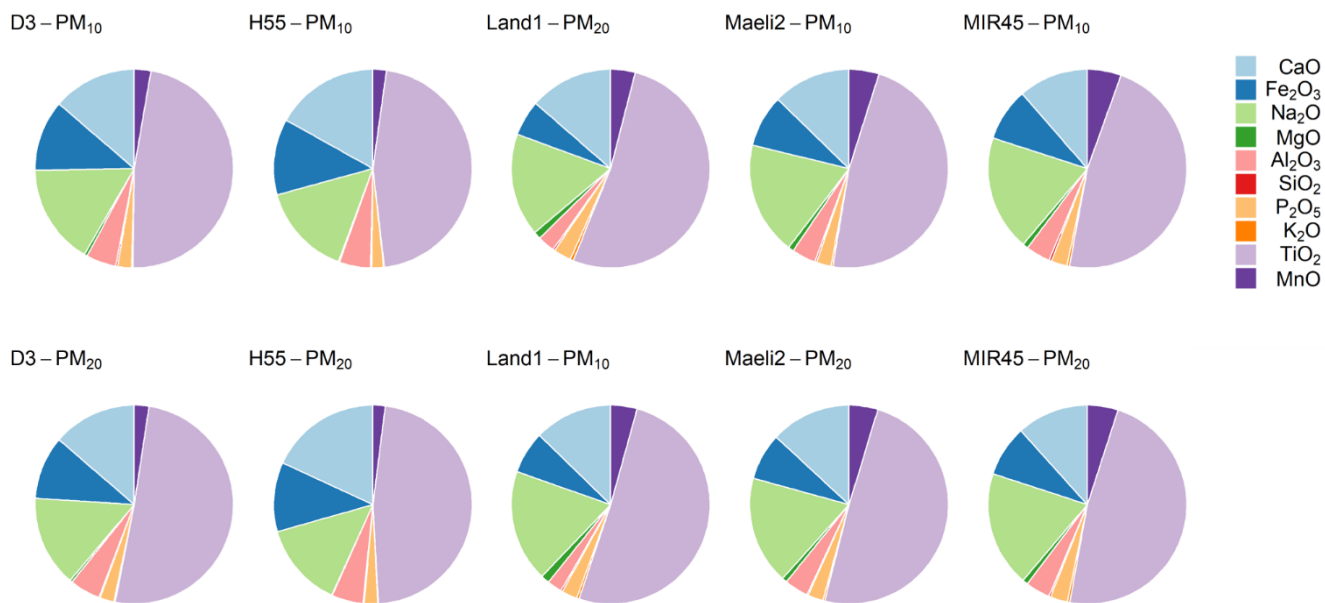

**Figure S2: Element oxide mass percentages of PM<sub>10</sub> (custom-made reactor) and PM<sub>20</sub> (CESAM chamber). The data uncertainty is ~12%, estimated using the error propagation formula.**

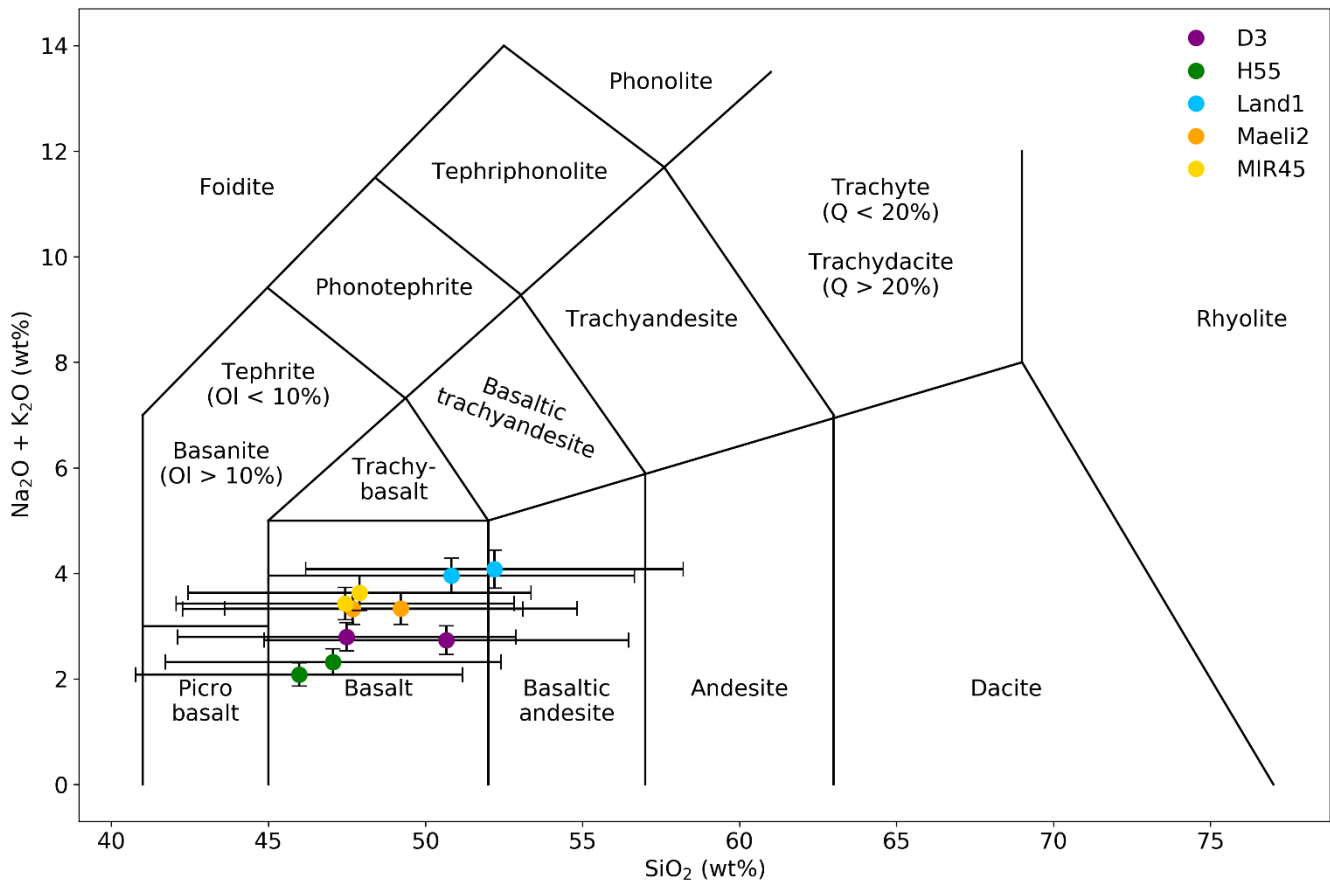

30

**Figure S3: Classification of the dust samples (PM<sub>10</sub> and PM<sub>20</sub> fractions) based on the total alkali and silica (TAS) contents from the XRF measurements. The data uncertainty was estimated using the error propagation formula.**

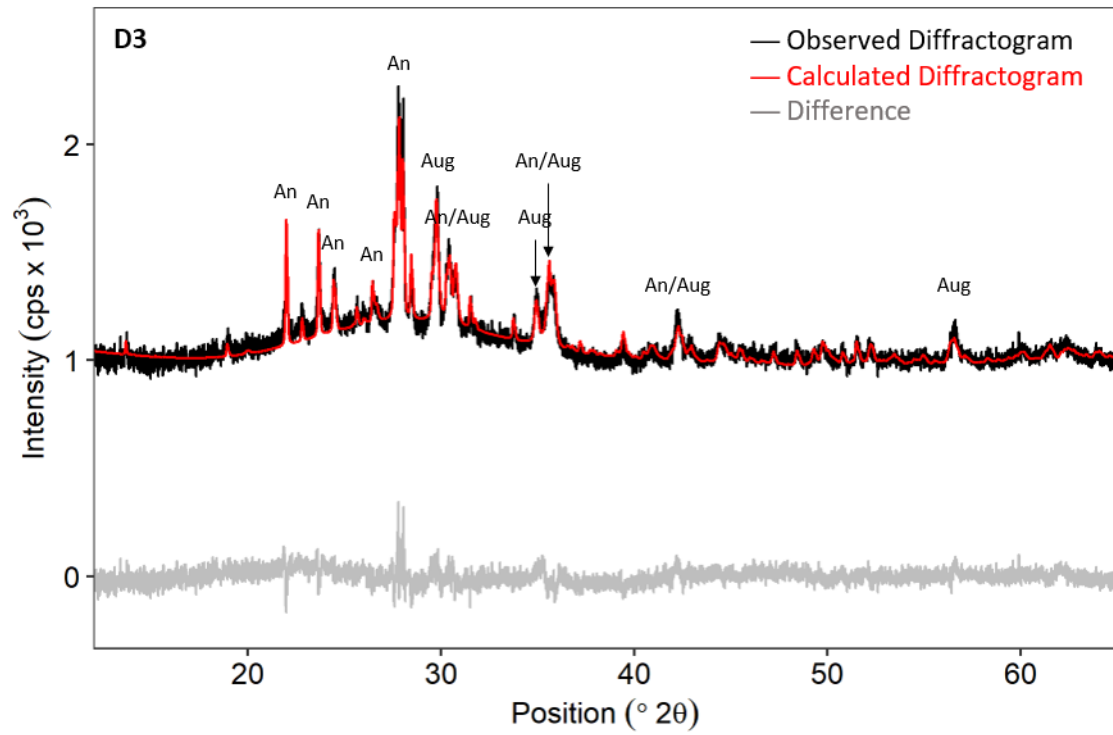

An = Anorthite #98-010-0235, Aug = Augite #98-003-4194

35 **Figure S4: Diffractogram of D3, PM<sub>10</sub> fraction.** The black curve corresponds to the experimental data and the red curve to the model by MAUD software. The grey curve is the difference between the observations and the model.

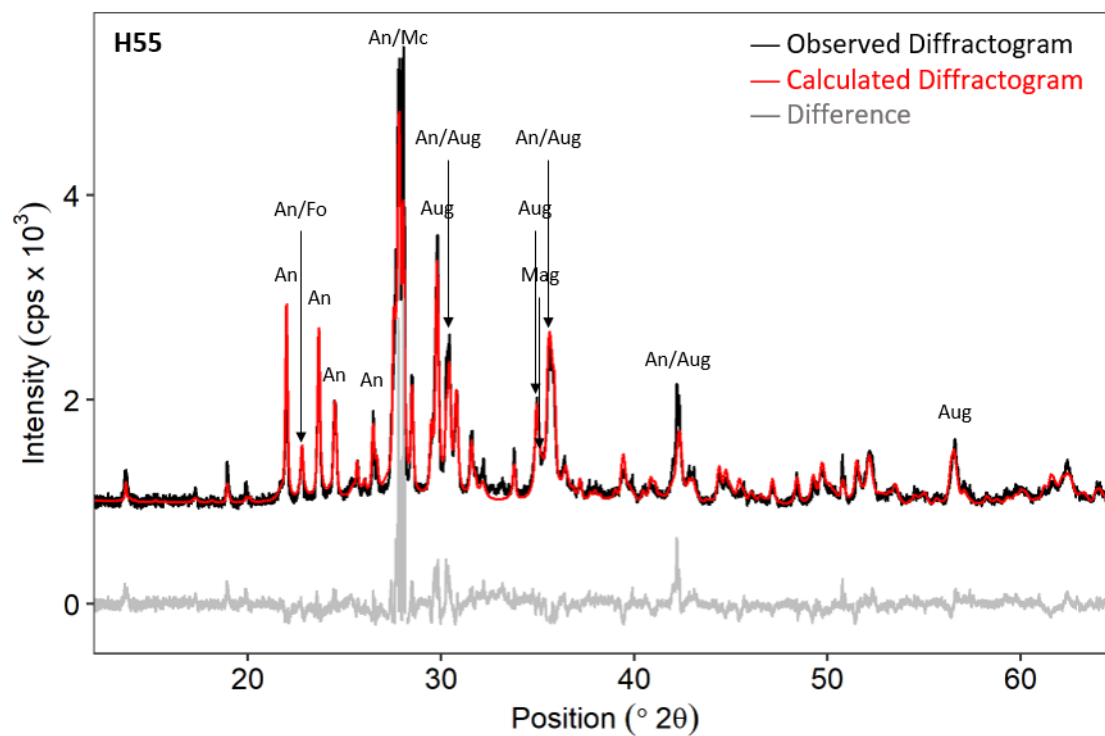

An = Anorthite #98-010-0235, Aug = Augite #98-003-4194, Fo = Forsterite #98-003-4112,  
 Mag = (Titanio)Magnetite #98-016-2356, Mc = Microcline #98-008-3534

40 **Figure S5: Diffractogram of H55, PM<sub>10</sub> fraction. The black curve corresponds to the experimental data and the red curve to the model by MAUD software. The grey curve is the difference between the observations and the model.**

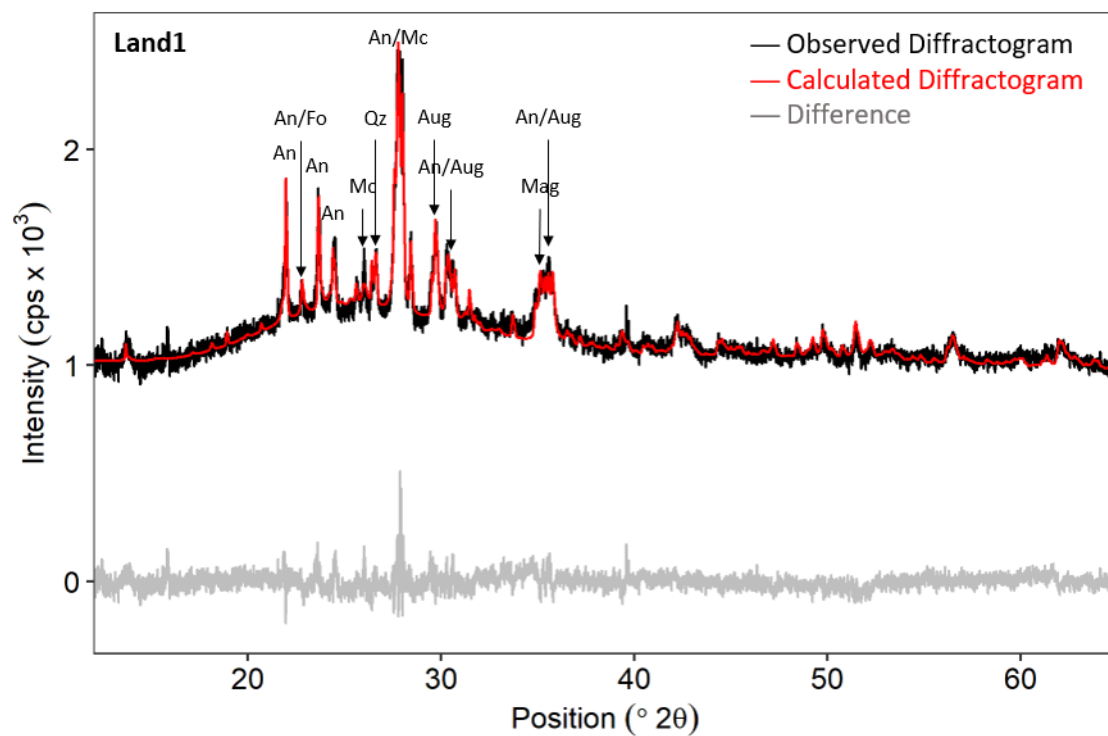

An = Anorthite #98-010-0235, Aug = Augite #98-003-4194, Fo = Forsterite #98-003-4112,  
 Mag = (Titanio)Magnetite #98-016-2356, Mc = Microcline #98-008-3534, Qz = Quartz #98-009-3093

**Figure S6: Diffractogram of Land1, PM<sub>10</sub> fraction. The black curve corresponds to the experimental data and the red curve to the model by MAUD software. The grey curve is the difference between the observations and the model.**



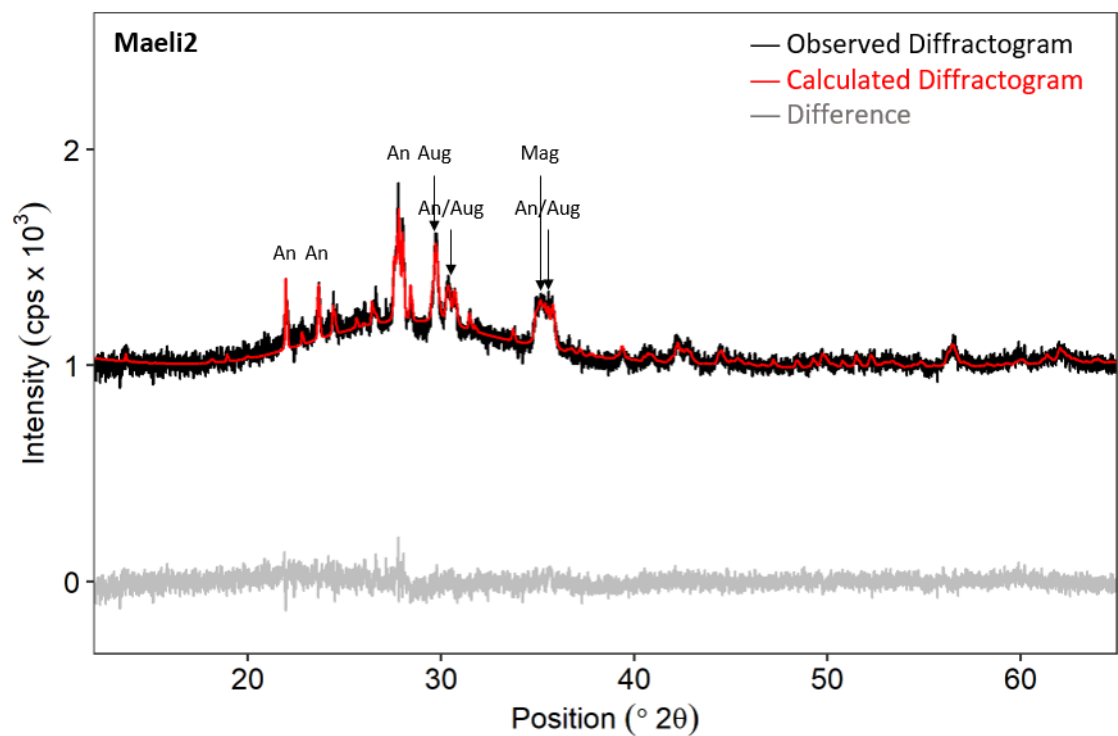

An = Anorthite #98-010-0235, Aug = Augite #98-003-4194, Mag = (Titanio)Magnetite #98-016-2356,

**Figure S7: Diffractogram of Maeli2, PM<sub>10</sub> fraction. The black curve corresponds to the experimental data and the red curve to the model by MAUD software. The grey curve is the difference between the observations and the model.**

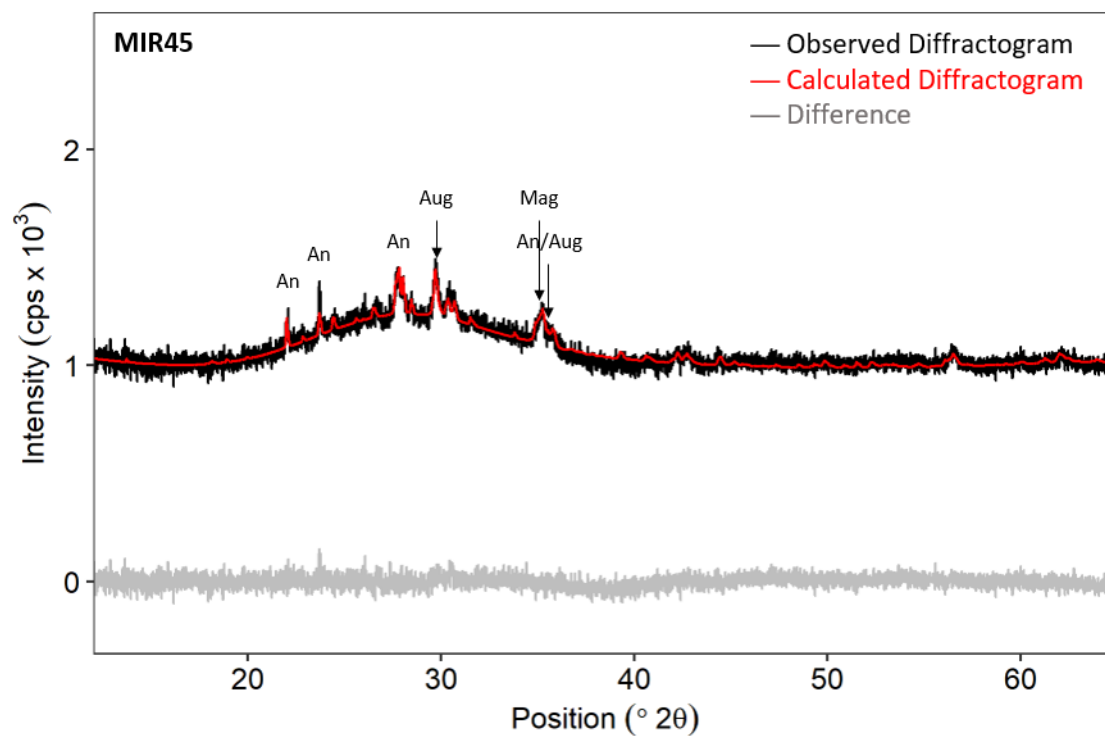

An = Anorthite #98-010-0235, Aug = Augite #98-003-4194, Mag = (Titanio)Magnetite #98-016-2356,

50

**Figure S8: Diffractogram of MIR45, PM<sub>10</sub> fraction. The black curve corresponds to the experimental data and the red curve to the model by MAUD software. The grey curve is the difference between the observations and the model.**

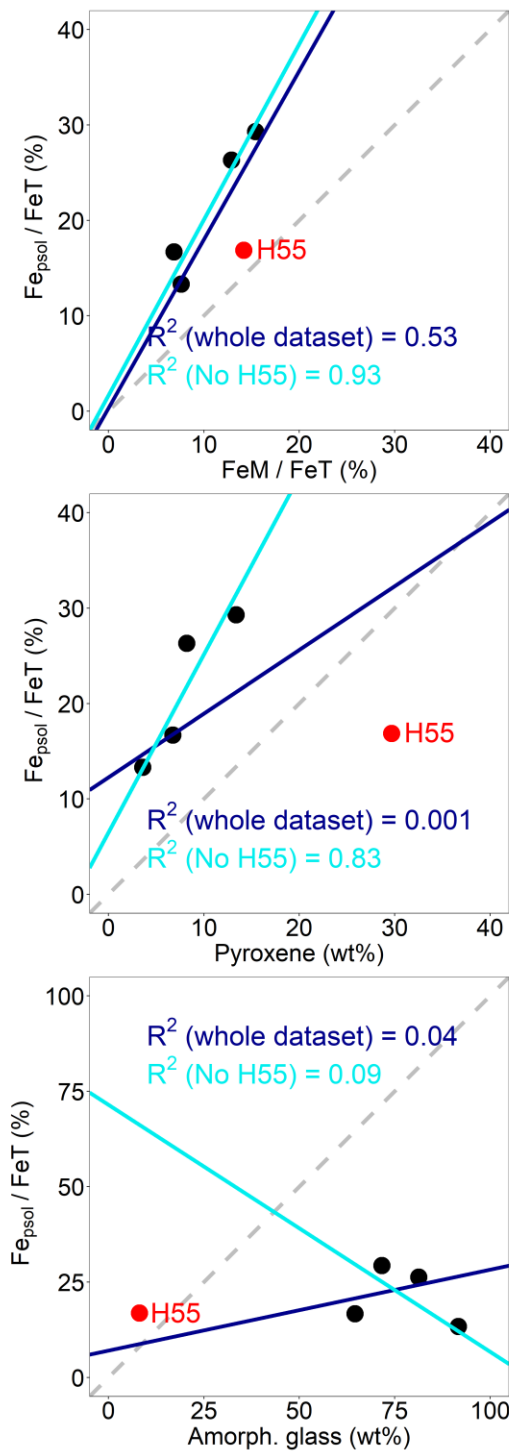

55 **Figure S9: Correlation of  $Fe_{psol} / FeT$  (%) with the content of magnetite ( $FeM / FeT$ , %), pyroxene (wt%) and amorphous glass (wt%). The regression line in blue was calculated based on the whole dataset. The regression line in light blue was calculated excluding H55 (the dust sample with the lowest amorphous fraction).**

## References

- Bedidi, A., and Cervelle, B.: Light scattering by spherical particles with hematite and goethitelike optical properties: effect of water impregnation, *Journal of Geophysical Research: Solid Earth*, 98, 11941-11952, doi: 10.1029/93JB00188, 1993.
- 60 Egan, W., and Hilgeman, T.: *Optical Properties of Inhomogeneous Materials: Applications to Geology, Astronomy, Chemistry and Engineering* Academic Press, New York, 1979.
- Fabian, D., Henning, Th., Joger, C., Mutschke, H., Dorschner, J., Werhan, O.: Olivine, EODG ARIA, available at [http://eodg.atm.ox.ac.uk/ARIA/data?Minerals/Olivine/non-oriented\\_\(Fabian\\_et\\_al.\\_2001\)/olivine\\_Fabian\\_2001.ri](http://eodg.atm.ox.ac.uk/ARIA/data?Minerals/Olivine/non-oriented_(Fabian_et_al._2001)/olivine_Fabian_2001.ri) (last access: 02 January 2020), 2001.
- 65 Huffman, D. R., and Stapp, J. L.: Optical measurements on solids of possible interstellar importance, in: *Interstellar dust and related topics*, Springer, 297-301, 1973.
- Khashan, M. A. and Nasif, A. Y.: Quartz, EODG ARIA, available at [http://eodg.atm.ox.ac.uk/ARIA/data?Minerals/Quartz/\(Khashan\\_and\\_Nassif\\_2001\)/quartz\\_Khashan\\_2001.ri](http://eodg.atm.ox.ac.uk/ARIA/data?Minerals/Quartz/(Khashan_and_Nassif_2001)/quartz_Khashan_2001.ri) (last access: 02 January 2020), 2001.
- Longtin, D. R., Shettle, E. P., Hummel, J. R., and Pryce, J. D.: A wind dependent desert aerosol model: Radiative properties, 70 AFGLTR-88-0112, Air Force Geophysics Laboratory, Hanscom AFB, MA, 1988.
- Pollack, J. B., Toon, O. B., and Khare, B. N.: Optical properties of some terrestrial rocks and glasses, *Icarus*, 19, 372-389, 1973.
- Querry, M. R.: Magnetite, Refractive index database, available at <https://refractiveindex.info/?shelf=main&book=Fe3O4&> (last access: 02 January 2020), 1985.
